# Supplementary material for: Phylogenetic Analyses of Lizards from the Chilean Humboldt Archipelago Reveal a New Species for the Chañaral Island (Squamata: Liolaemidae)
Source: MDPI journal article supplement (doi:10.3390/ani13223576), 2023-11-19
Supplement: s1 [file s1]

**Table S1:** GenBank accession numbers of taxa used in this study

| Haplotype<br>or Taxa | <i>Liolaemus</i> species    | Locality                         | N  | Accession<br>number |
|----------------------|-----------------------------|----------------------------------|----|---------------------|
| H1                   | <i>L. carezzae</i> sp. nov. | Chañaral Island                  | 17 | OQ625482            |
| H2                   | <i>L. carezzae</i> sp. nov. | Chañaral Island                  | 1  | OQ625483            |
| H3                   | <i>L. carezzae</i> sp. nov. | Chañaral Island                  | 2  | OQ625484            |
| H4                   | <i>L. carezzae</i> sp. nov. | Chañaral Island                  | 1  | OQ625485            |
| H5                   | <i>L. carezzae</i> sp. nov. | Chañaral Island                  | 1  | OQ625486            |
| H6                   | <i>L. carezzae</i> sp. nov. | Chañaral Island                  | 5  | OQ625487            |
| H7                   | <i>L. carezzae</i> sp. nov. | Chañaral Island                  | 1  | OQ625488            |
| H8                   | <i>L. silvai</i>            | Caleta Chañaral                  | 1  | OQ625489            |
| H9                   | <i>L. silvai</i>            | Gaviota (5) and Damas Island (1) | 6  | OQ625490            |
| H10                  | <i>L. silvai</i>            | Gaviota Island                   | 2  | OQ625491            |
| H11                  | <i>L. silvai</i>            | Damas (6) and Gaviota Island (1) | 7  | OQ625492            |
| H12                  | <i>L. silvai</i>            | Gaviota Island                   | 1  | OQ625493            |
| H13                  | <i>L. silvai</i>            | Choros Island, Punta Choros      | 4  | OQ625494            |
| H14                  | <i>L. silvai</i>            | Choros Island                    | 1  | OQ625495            |
| H15                  | <i>L. silvai</i>            | Choros Island                    | 1  | OQ625496            |
| H16                  | <i>L. silvai</i>            | Choros Island                    | 2  | OQ625497            |
| H17                  | <i>L. silvai</i>            | Punta Choros                     | 1  | OQ625498            |
| H18                  | <i>L. silvai</i>            | Punta Choros                     | 1  | OQ625499            |
| H19                  | <i>L. silvai</i>            | Punta Choros                     | 1  | OQ625500            |
| Lsilvai19            | <i>L. silvai</i>            | Punta Choros*                    | 1  | KJ452319*           |
| Lsilvai18            | <i>L. silvai</i>            | Caleta Chañaral*                 | 1  | KJ452318*           |
| Lsilvai07            | <i>L. silvai</i>            | Caleta Sarco*                    | 1  | KJ452307*           |
| Lsilvai05            | <i>L. silvai</i>            | Caleta Sarco*                    | 1  | KJ452305*           |
| Lzap310              | <i>L. zapallarensis</i>     | Totalalillo*                     | 1  | KJ452310*           |
| Lzap1068             | <i>L. zapallarensis</i>     | Los Molles                       | 1  | OQ632905            |
| Lzap1054             | <i>L. zapallarensis</i>     | Los Molles                       | 1  | OQ632906            |
| Lzap1055             | <i>L. zapallarensis</i>     | Los Molles                       | 1  | OQ632907            |
| Lnigro4              | <i>L. nigromaculatus</i>    | Caldera*                         | 1  | KJ452304*           |
| Lnigro3              | <i>L. nigromaculatus</i>    | Caldera*                         | 1  | KJ452303*           |
| Lnigro2              | <i>L. nigromaculatus</i>    | Caldera*                         | 1  | KJ452302*           |
| Lnigro1              | <i>L. nigromaculatus</i>    | Caldera*                         | 1  | KJ452301*           |
| Lnigro94             | <i>L. nigromaculatus</i>    | Vallenar*                        | 1  | KJ452294*           |
| Lata0                | <i>L. atacamensis</i>       | El Trapiche*                     | 1  | KJ452300*           |
| Lata99               | <i>L. atacamensis</i>       | El Trapiche*                     | 1  | KJ452299*           |
| Lata98               | <i>L. atacamensis</i>       | Freirina*                        | 1  | KJ452298*           |
| Lata97               | <i>L. atacamensis</i>       | Freirina*                        | 1  | KJ452297*           |
| <i>L. platei</i>     | <i>L. platei</i>            | Coquimbo*                        | 1  | KJ452325*           |

\*: Localities and accession number reported in [13]; In brackets the number of sequences of this locality when there are shared haplotypes is shown; N: number of sequences. The taxa Lsilvai19, Lsilvai18, Lsilvai07 and Lsilvai05 correspond to the haplotypes H20, H21, H22 and H23 respectively in the network (Figure 3).

**Table S2.** Primary measurements and key characteristics exhibited by *Liolaemus carezzae* sp. nov. and *L. silvai*. This section presents a detailed account of the primary measurements and key characteristics exhibited by individuals of *L. carezzae* sp. nov. collected from Chañaral Island, as well as individuals belonging to the species *L. silvai*.

|      | <i>Liolaemus carezzae</i> sp. nov.                            |            | <i>L. silvai</i>                      |                               |
|------|---------------------------------------------------------------|------------|---------------------------------------|-------------------------------|
|      | Male N=3                                                      | Female N=1 | Male N=8 <sup>1</sup>                 | Female N=6 <sup>1</sup>       |
| SAB  | 44-49 (47)                                                    | 46         | 49-51 (50) <sup>1</sup>               | 49-52 (50) <sup>1</sup>       |
| DS   | 42-45 (43.3)                                                  | 40         | 42-45 (44) <sup>1</sup>               | 41-46 (43) <sup>1</sup>       |
| VS   | 67-71 (69.3)                                                  | 69         | U <sup>1</sup>                        | U <sup>1</sup>                |
| HS   | 11 (11)                                                       | 10         | 11-14 (12) <sup>1</sup>               | 12-14 (13) <sup>1</sup>       |
| SVL  | 61-74 (67)                                                    | 62         | 55.5-68.1 (63.6) <sup>1</sup>         | 51.5-65 (57.2) <sup>1</sup>   |
| TRL  | 30-35 (32.3)                                                  | 30         | 28.3-33.0 (31.0) <sup>1</sup>         | 28.0-35.6 (28.8) <sup>1</sup> |
| TL   | 58-88 (75.3)                                                  | 80         | 88.0-91.4 (88.7) <sup>1</sup>         | 63.8 (63.8) <sup>1</sup>      |
| HL   | 15-21 (17.3)                                                  | 15         | 13.7-16.5 (15.3) <sup>1</sup>         | 11.3-14.2 (12.4) <sup>1</sup> |
| HW   | 12-15 (13)                                                    | 11         | 10.4-13.8 (12.4) <sup>1</sup>         | 9.4-11.5 (10.0) <sup>1</sup>  |
| HH   | 11-14 (12.3)                                                  | 10         | 8.0-9.5 (8.6) <sup>1</sup>            | 6.7-8.3 (7.6) <sup>1</sup>    |
| FoL  | 20 (20)                                                       | 20         | 14.4-18.2 (16.9) <sup>1</sup>         | 18.4-21.3 (20.0) <sup>1</sup> |
| SINT | 15-19 (16.3)                                                  | 17         | 22-26 (24) <sup>1</sup>               | 22-25 (23) <sup>1</sup>       |
| AL   | 21.3-21.8 (21.5)                                              | 19.8       | (21.6) <sup>2</sup>                   | (19.5) <sup>2</sup>           |
| SDS  | Lanceolate, imbricate, strongly keeled and strongly mucronate |            | Lanceolate or rhomboidal <sup>2</sup> |                               |

SAB: Scales around the midbody. DS: Dorsal scales. VS: Ventral scales. HS: Head scales. SVL: Snout vent length. TRL: Trunk length. TL: Tail length. HL: Head length. HW: Head width. HH: Head height. FoL: Foot length. SINT: Number of infradigital scales on the fourth toe. AL: Arm length. SDS: Shape of dorsal scales N: number of individual measured. Dimension are in millimetres. In parentheses is show the mean. U: unmeasured data; <sup>1</sup>: Data extracted from [30]; <sup>2</sup>: Characteristics reported in [13].

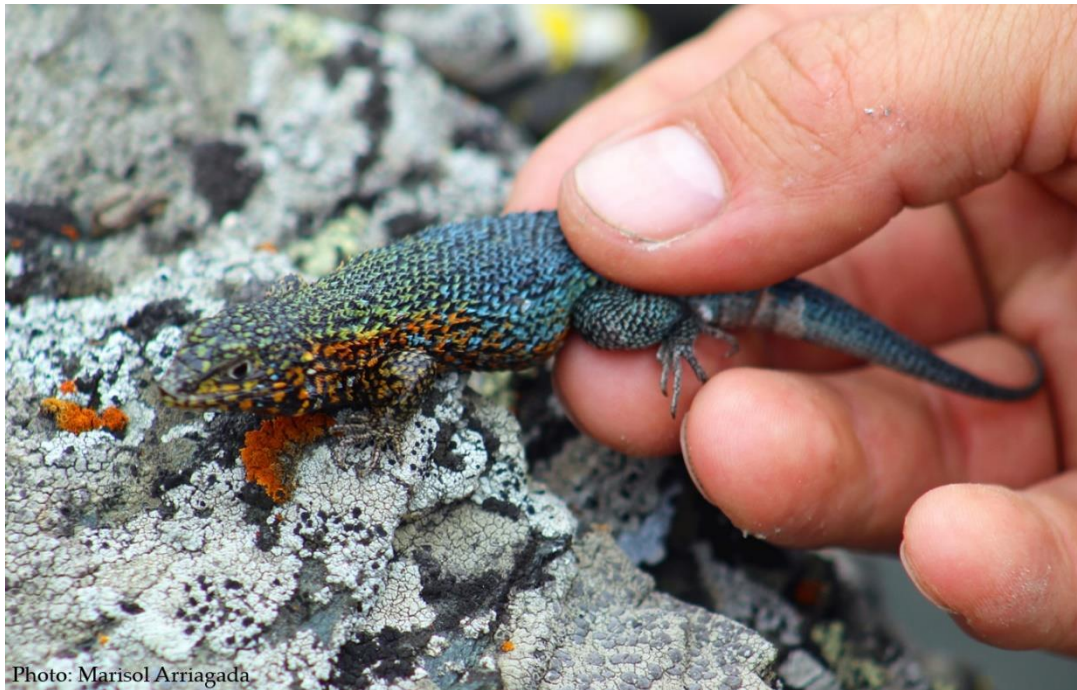

**Figure S1.** Characteristic colouration of *Liolaemus carezzae* sp. nov. photograph by Marisol Arriagada. Holotype CFFPUCV-1117.



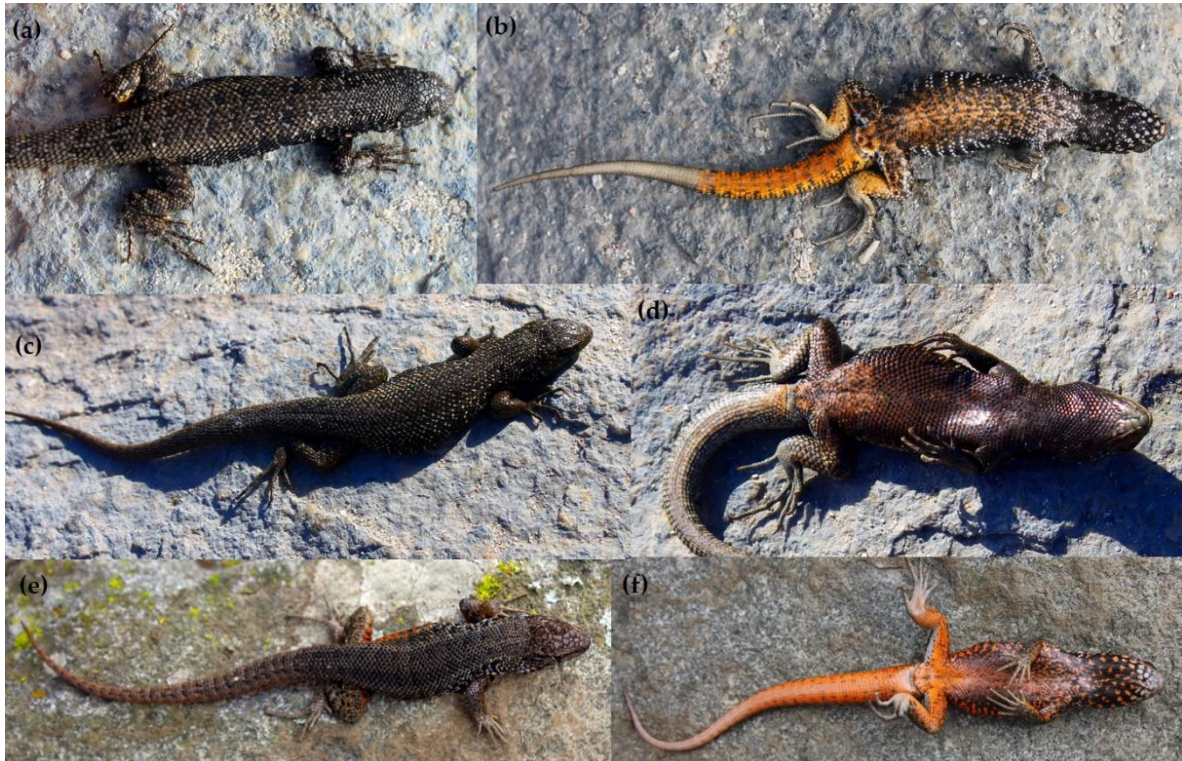

**Figure S2.** Colour variation of lizards from Damas and Choros Islands. (a), (b) Male from Damas Island. (c), (d) Melanistic male from Damas Island. (e), (f) Male from Choros Island. Photographs by Ricardo Campos-Soto.

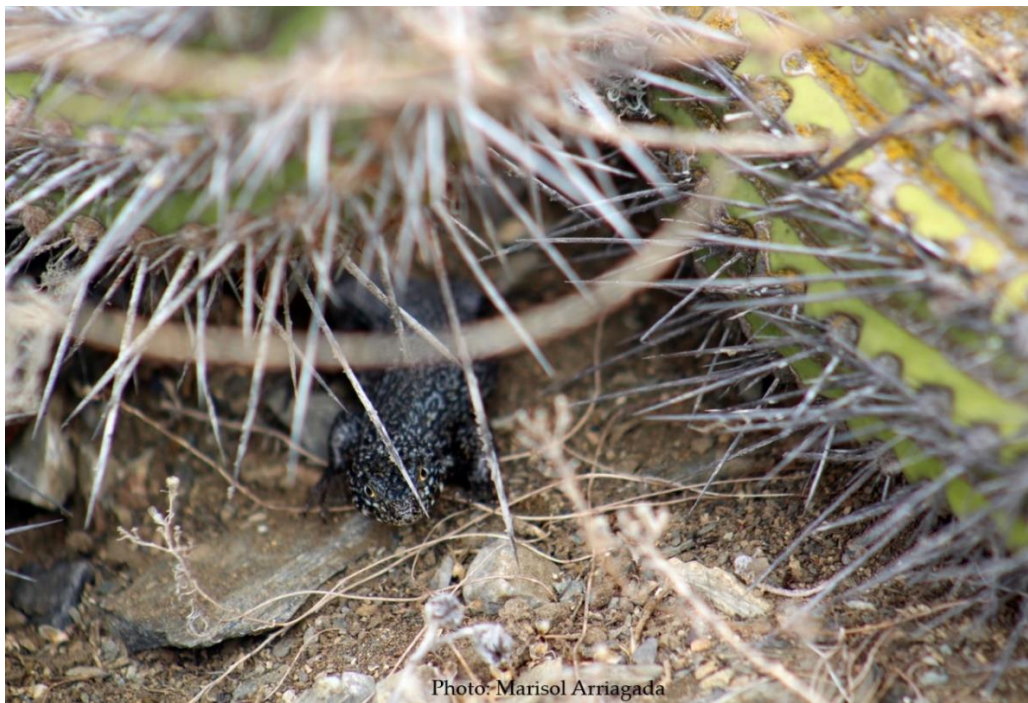

**Figure S3.** Male of *Liolaemus carezzae* sp. nov. taking refuge between cacti. Photograph by Marisol Arriagada. Paratype CFFPUCV-1119.

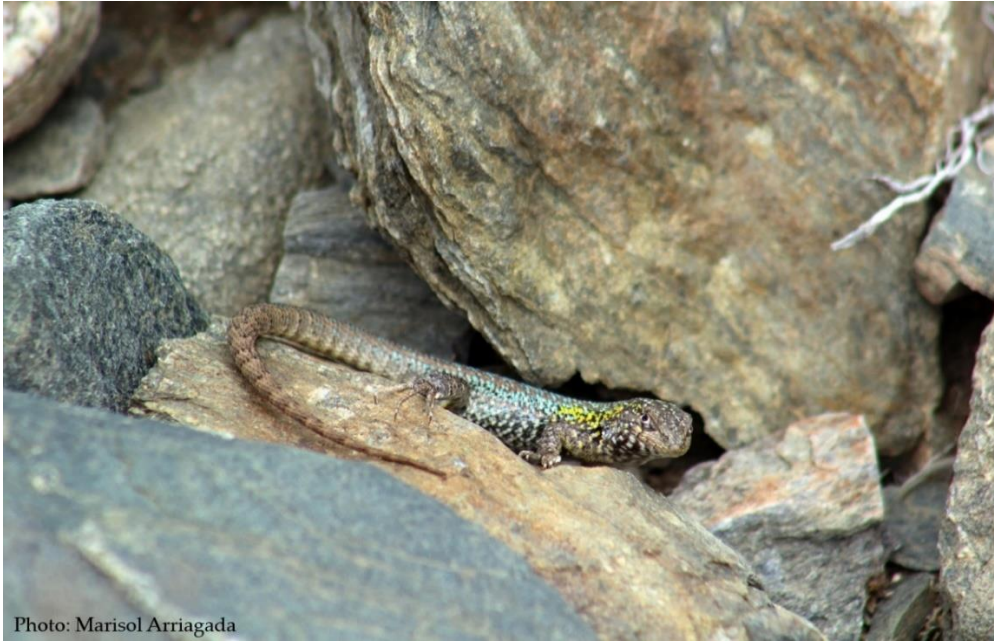

Photo: Marisol Arriagada

**Figure S4.** Female of *Liolaemus carezzae* sp. nov. on a rocky substrate. Photograph by Marisol Arriagada. Paratype CFFPUCV-1115.
